# Supplementary material for: Altered levels of CSF proteins in patients with FTD, presymptomatic mutation carriers and non-carriers
Source: PubMed Central journal article supplement (PMC7310563; doi:10.1186/s40035-020-00198-y), 2020-06-23

**Neurocan core protein**  
HPA058000

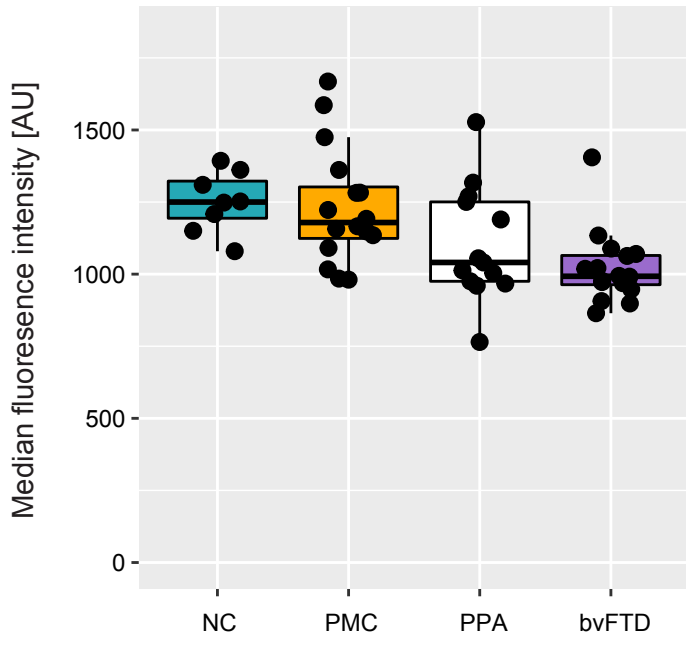

**Calsyntenin-1**  
HPA012749

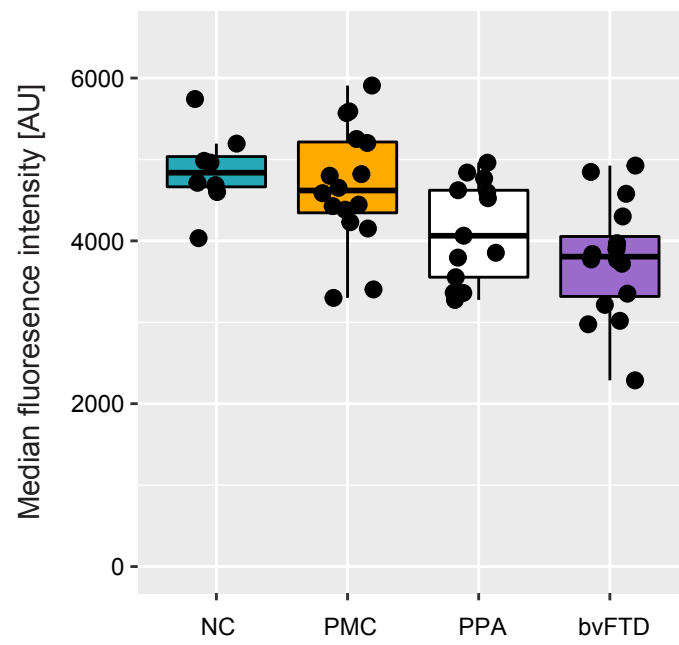

**Cadherin-8**  
HPA014908

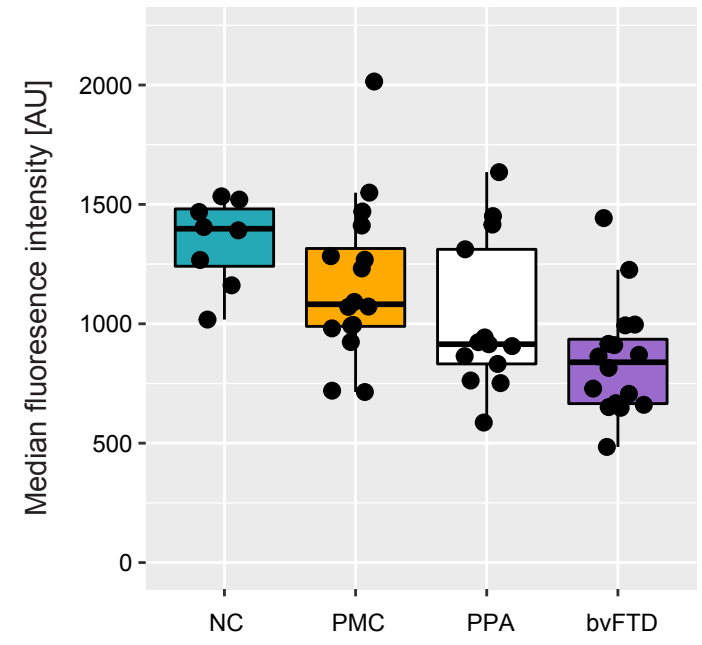

**Neural cell adhesion molecule  
L1-like protein**  
HPA003345

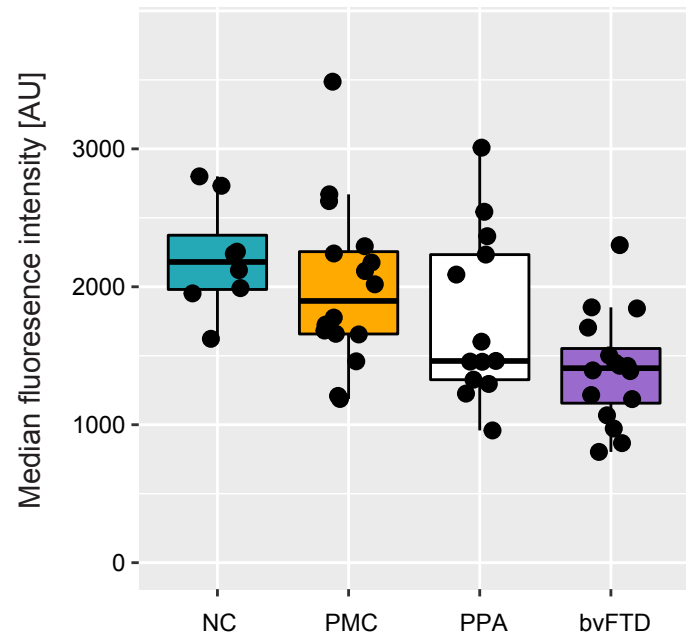

**Rabphilin-3A**  
HPA002475

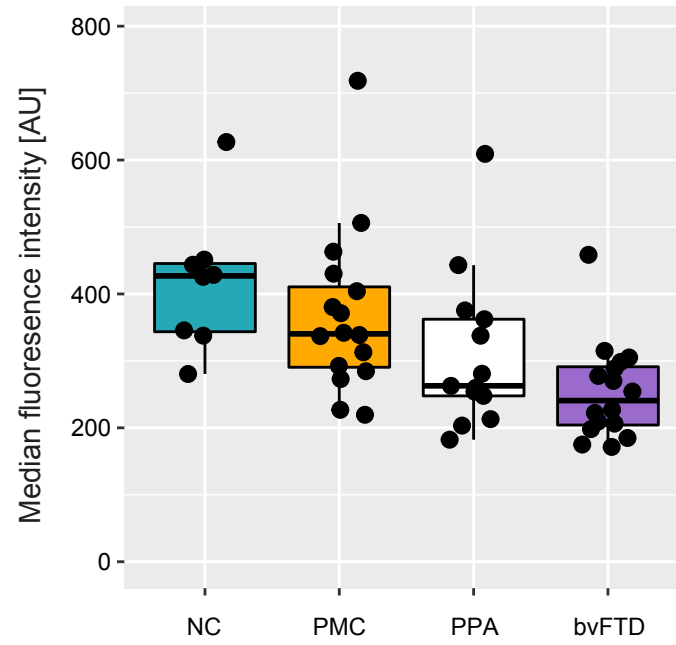

**Peptidyl glycine alpha amidating  
monooxygenase**  
HPA042260

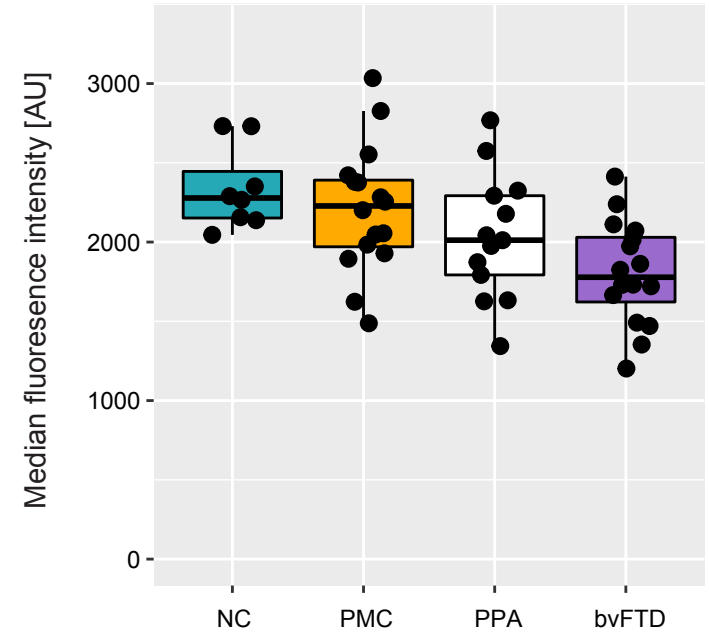

**Neuronal pentraxin-1**  
HPA077062

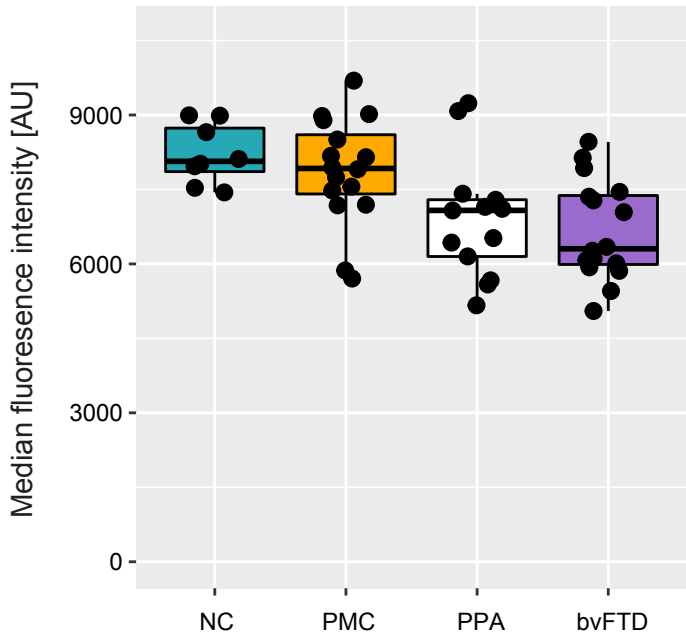

**von Willebran factor C domain-  
containing protein 2-like**  
HPA059414

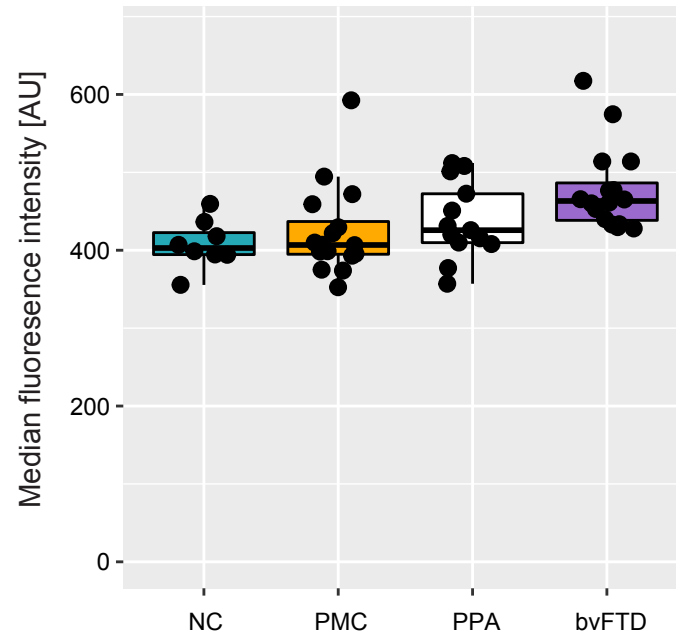

**Tripeptidyl peptidase 1**  
HPA037709

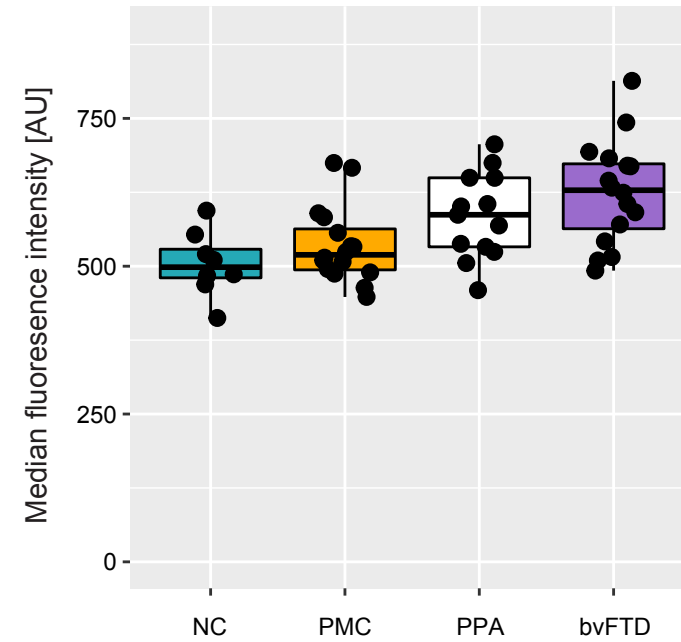

**Amyloid-like protein 1**  
HPA028971

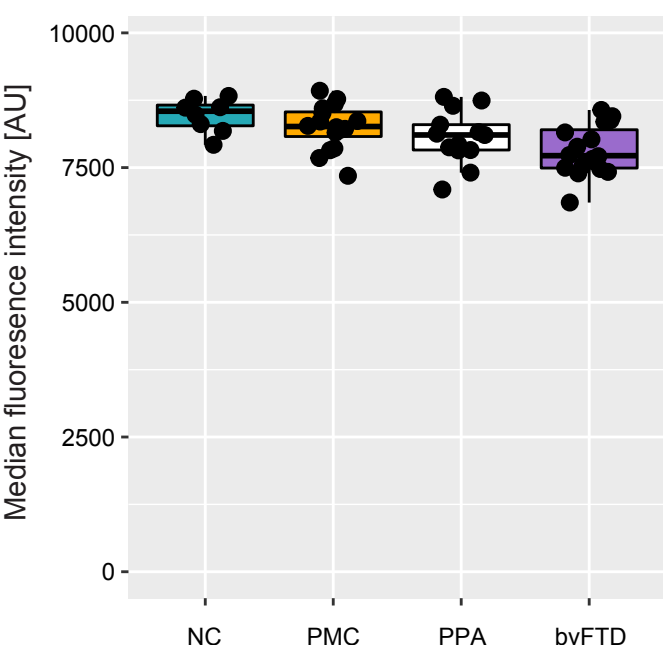

**Apolipoprotein A1**  
HPA046715

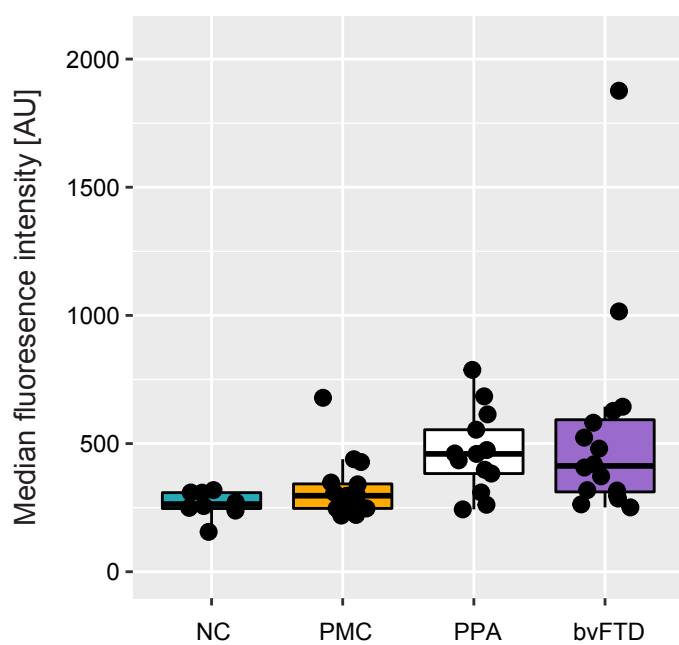

**Neurofilament medium polypeptide**  
HPA023138

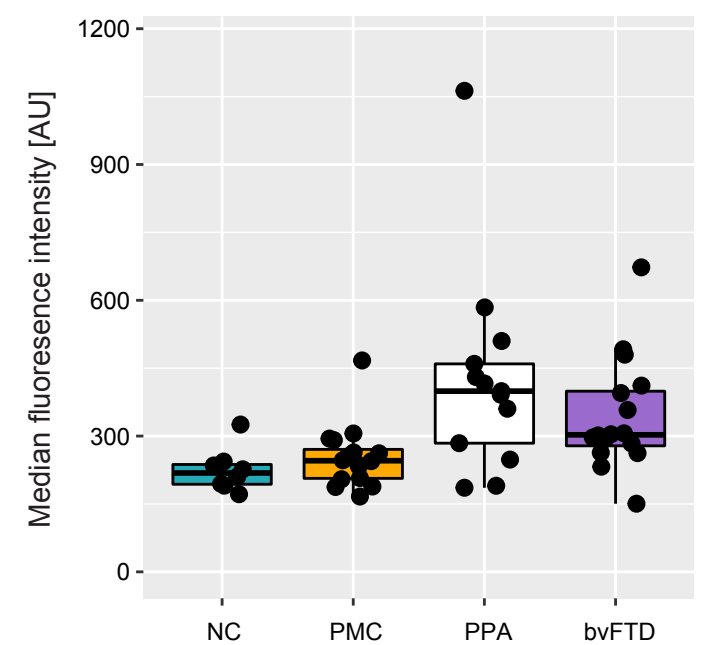

**Leucine-rich alpha-2-glycoprotein**  
HPA001888

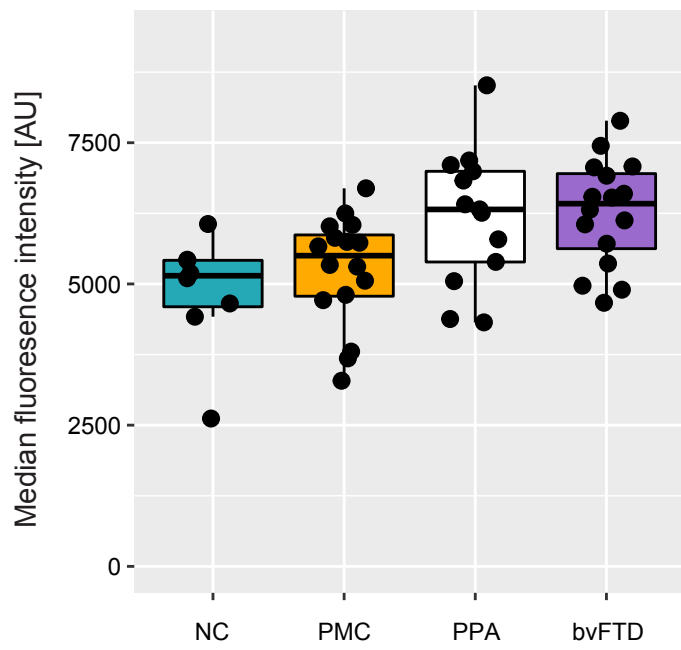

**Alpha-1-antichymotrypsin**  
HPA000893

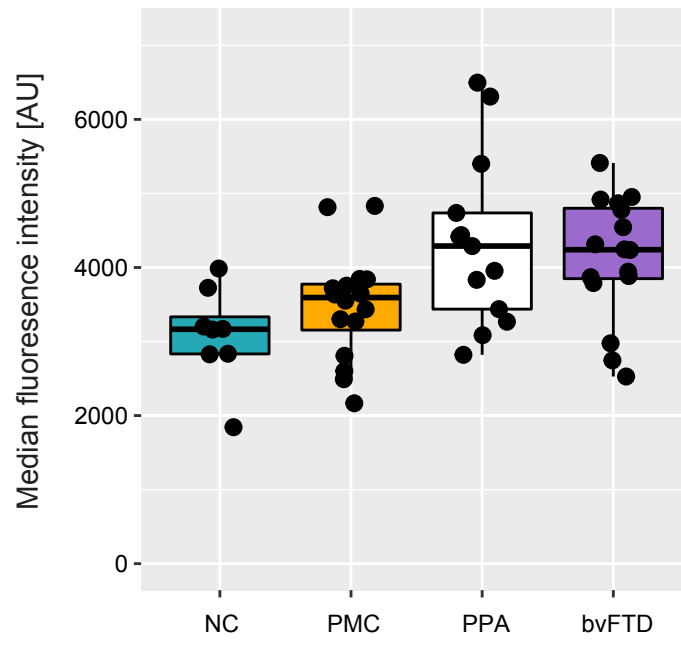

**UPF0606 protein KIAA1549L**  
HPA051594

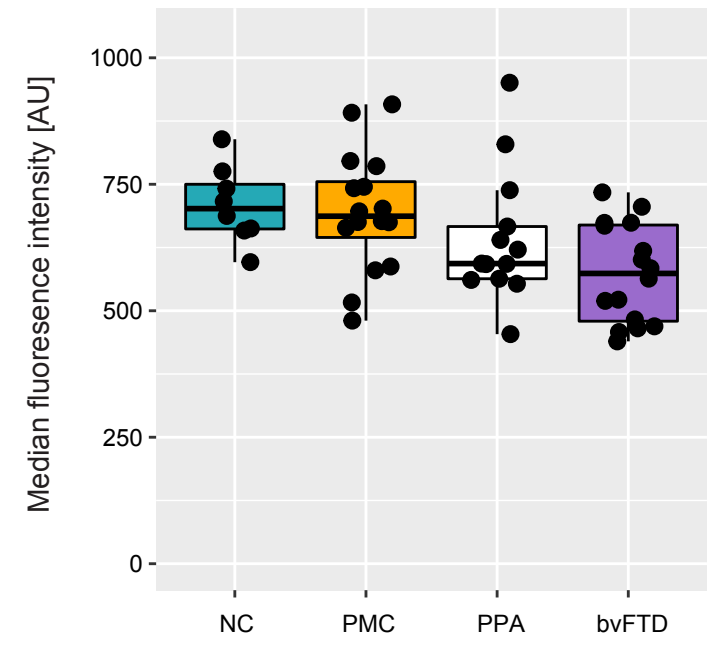

**Inter alpha trypsin inhibitor heavy chain H1**  
HPA042049

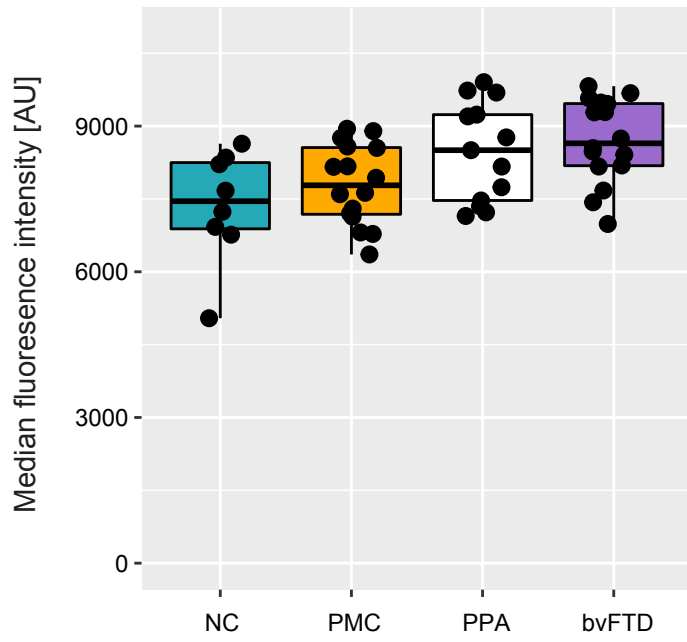

**Oligodendrocyte-myelin glycoprotein**  
HPA008206

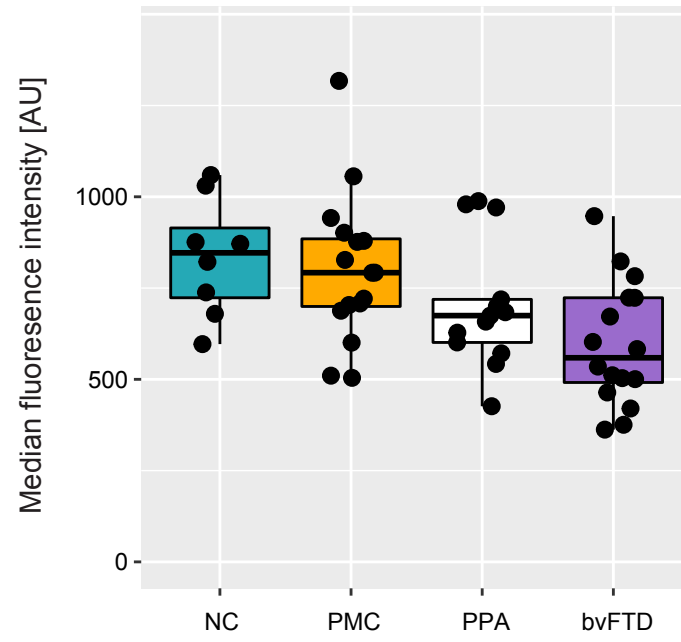

**Neuronal cell adhesion molecule**  
HPA061433

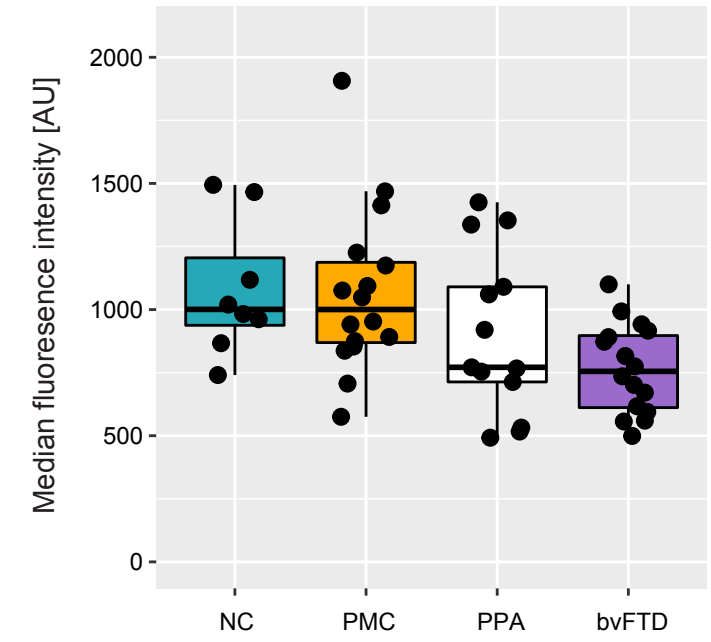

**TAR-DNA binding protein 43**  
HPA070770

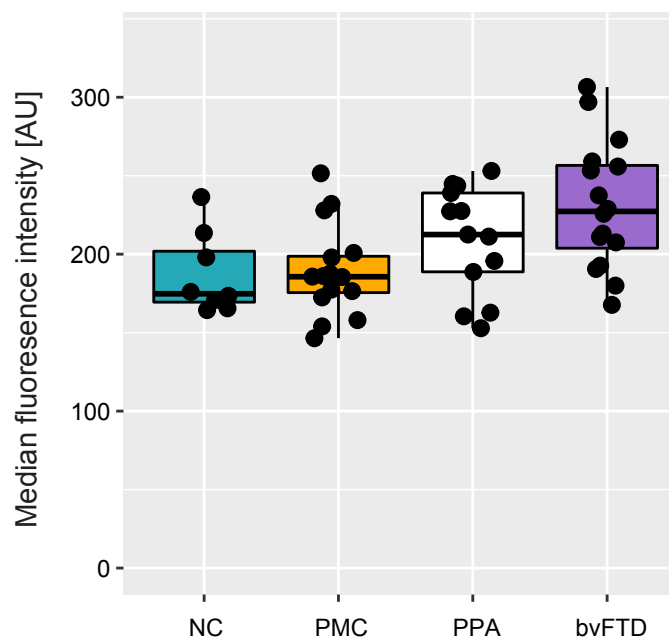

**Brevican core protein precursor**  
HPA007865

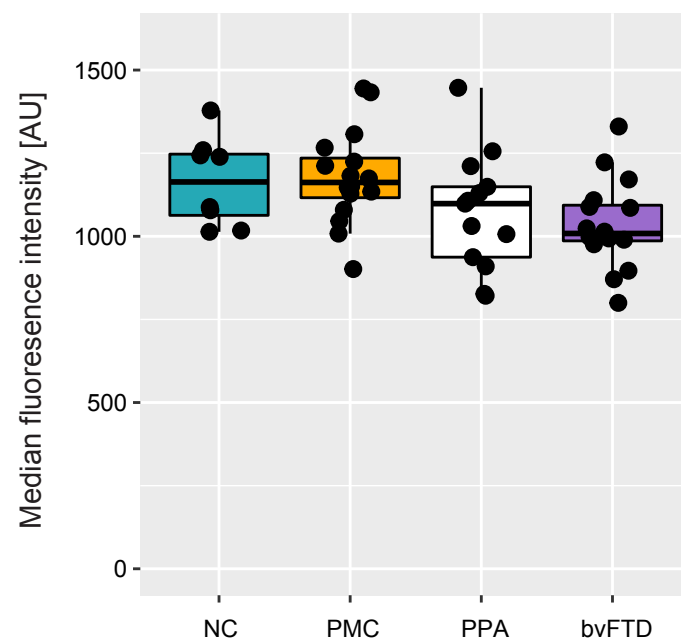

**Phosphoinositide-3-kinase-interacting protein 1**  
HPA007353

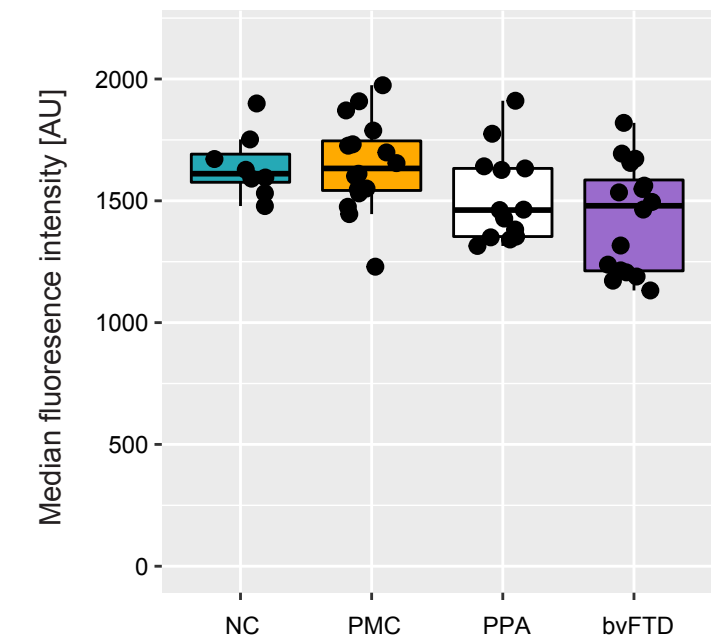

Supplement: 40035_2020_198_MOESM2_ESM.pdf [file 40035_2020_198_MOESM2_ESM.pdf]
