# Supplementary material for: Altered levels of CSF proteins in patients with FTD, presymptomatic mutation carriers and non-carriers
Source: PubMed Central journal article supplement (PMC7310563; doi:10.1186/s40035-020-00198-y), 2020-06-23

**A**

## Detection antibody 20664-1-AP

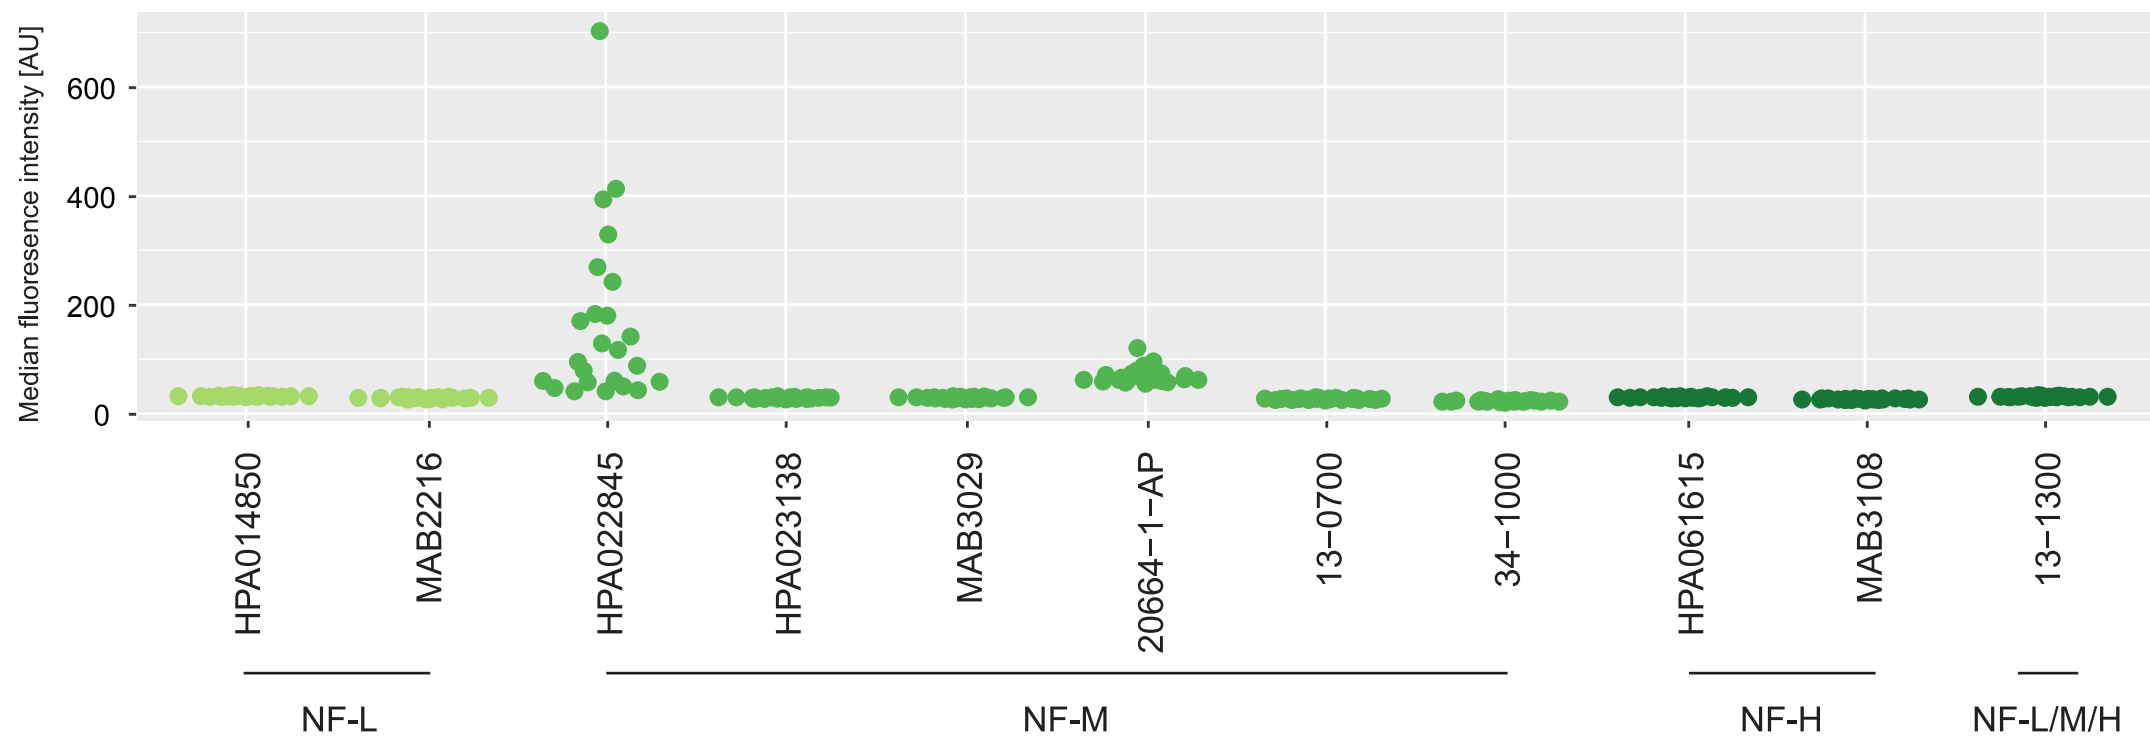**D**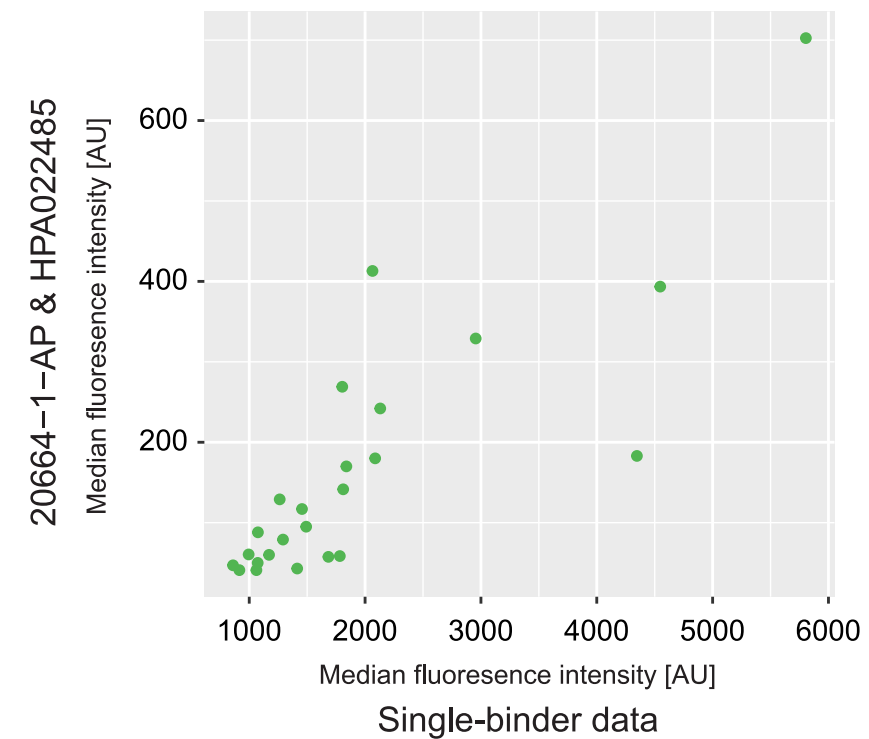**B**

## Detection antibody 13-0700

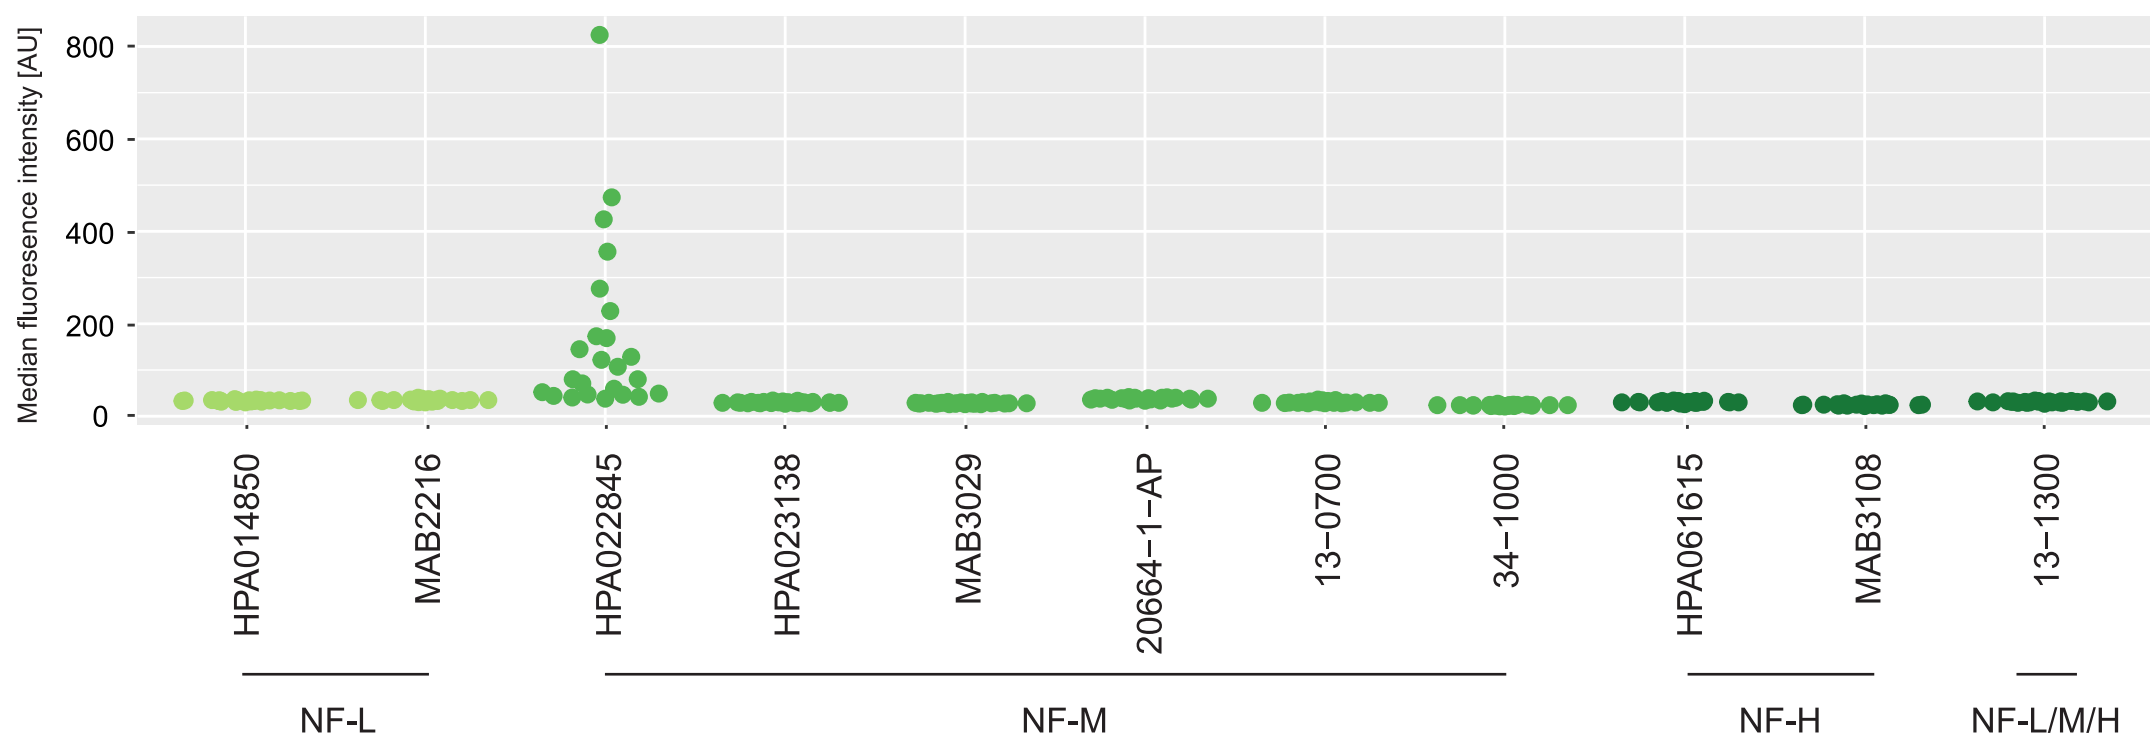**E**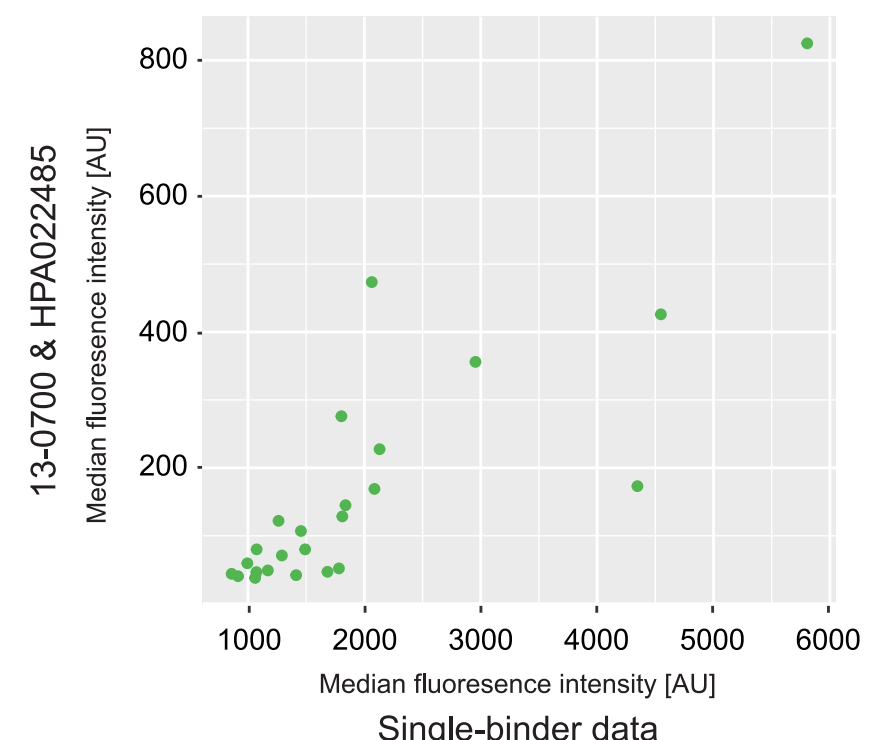**C**

## Detection antibody 34-1000

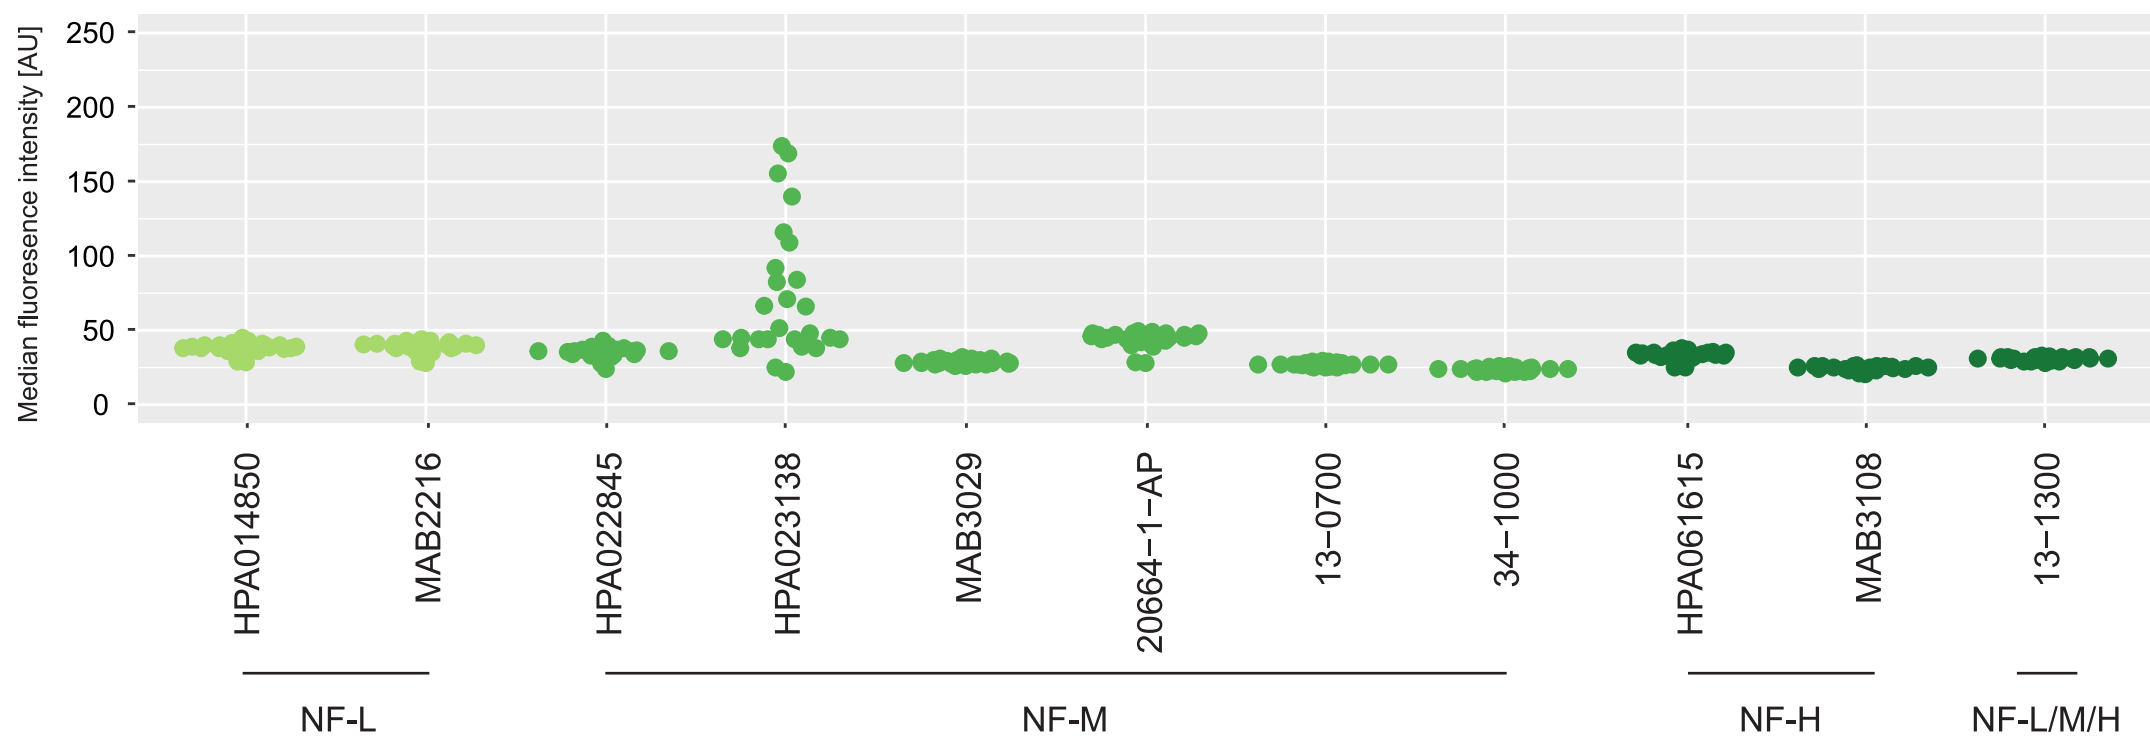**F**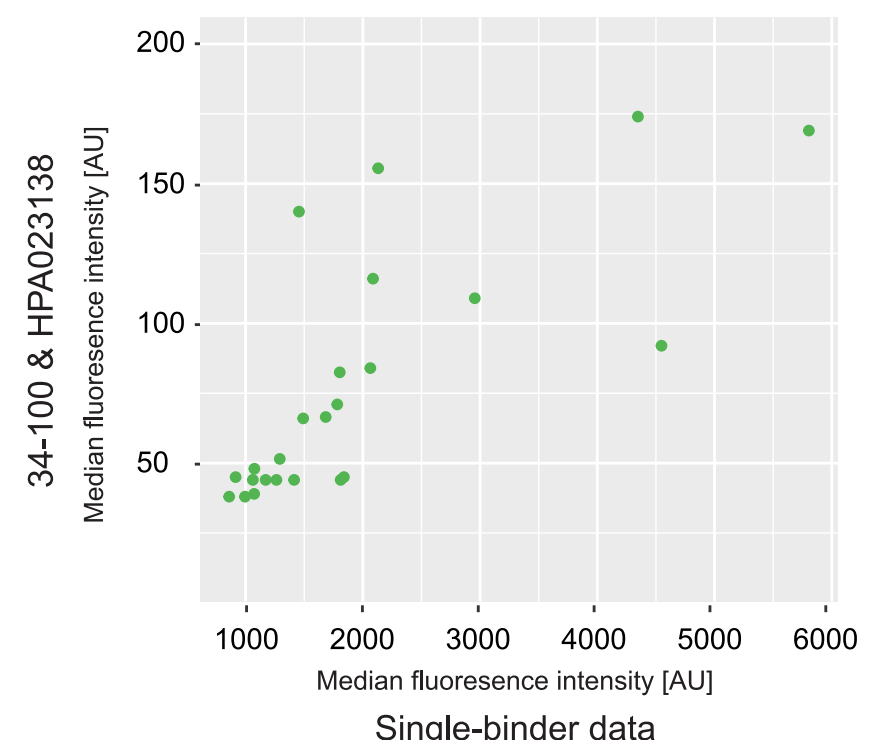

Supplement: 40035_2020_198_MOESM3_ESM.pdf [file 40035_2020_198_MOESM3_ESM.pdf]
