# Supplementary material for: Altered levels of CSF proteins in patients with FTD, presymptomatic mutation carriers and non-carriers
Source: PubMed Central journal article supplement (PMC7310563; doi:10.1186/s40035-020-00198-y), 2020-06-23

**A**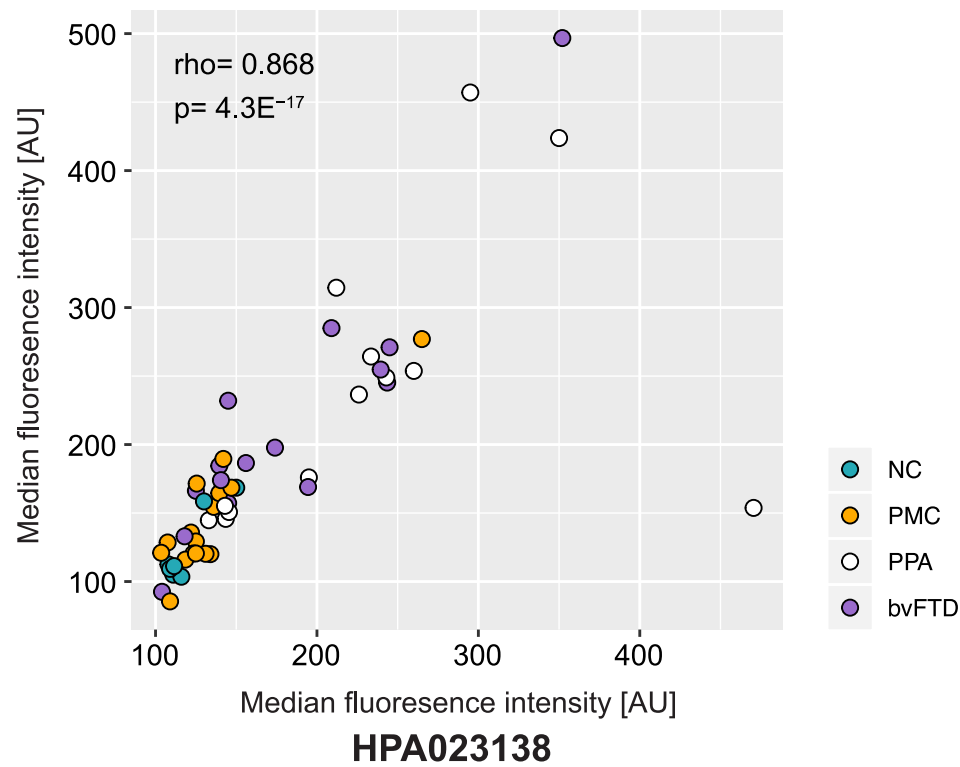**B****20664-1-AP & HPA022845**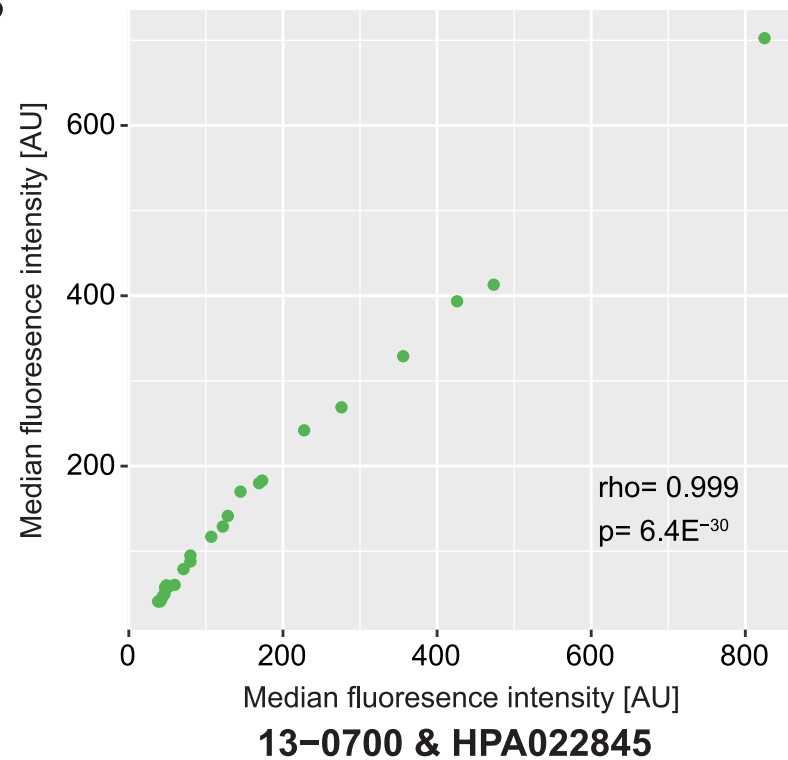**C****20664-1-AP & HPA022845**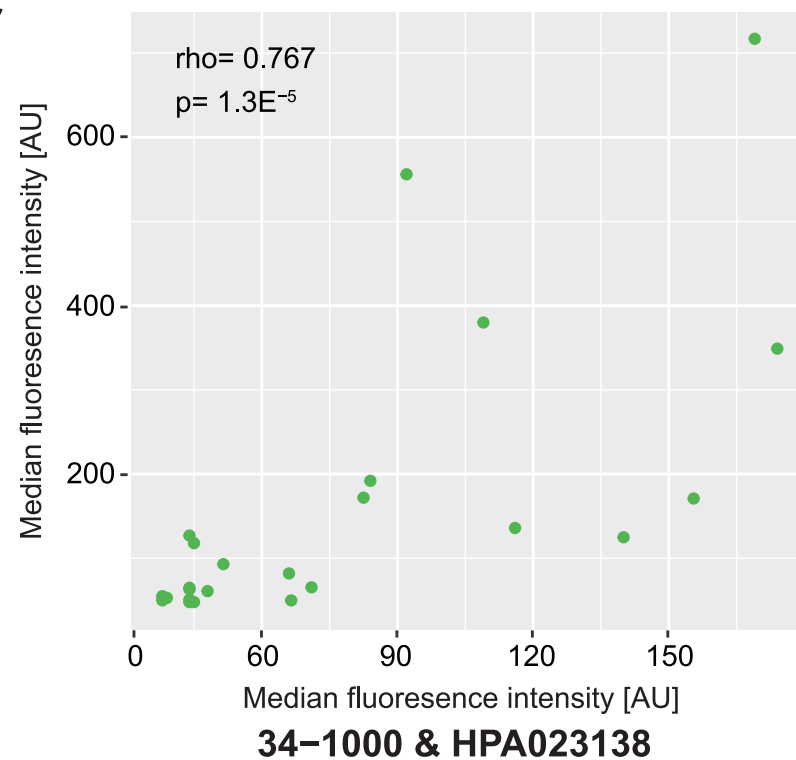

Supplement: 40035_2020_198_MOESM4_ESM.pdf [file 40035_2020_198_MOESM4_ESM.pdf]
